# Supplementary material for: Carbon sequestration by Australian tidal marshes
Source: PubMed Central journal article supplement (PMC5345033; doi:10.1038/srep44071), 2017-03-10
Supplement: srep44071-s1.pdf [file srep44071-s1.pdf]

## **Supplementary Information**

### **Carbon sequestration by Australian tidal marshes**

Peter I. Macreadie, Ollivier Q, Kelleway JJ, Serrano O, Carnell P, Ewers C, Atwood T, Sanderman J, Baldock J, Connolly RM, Duarte CM, Lavery P, Steven A, Lovelock C.E.

Appendix 1. Summary appendix. Organic carbon percent (%OC) and dry bulk density (DBD) within New South Wales are expressed as mean  $\pm$  standard error of the 0 – 20 cm soil layer, all other states represent the 0 – 30 cm soil layer. See methods for 1 m deep carbon stock calculations.

| Location                    | Estuary type           | Geomorphic Setting | Dominant vegetation                                                             | Latitude | Longitude | Cores | Dry bulk density (g cm <sup>3</sup> ) | Percent organic carbon (%OC) | Carbon Stock (Mg OC ha <sup>-1</sup> , 30 cm depth) | Carbon Stock (Mg OC ha <sup>-1</sup> , 1m depth) |
|-----------------------------|------------------------|--------------------|---------------------------------------------------------------------------------|----------|-----------|-------|---------------------------------------|------------------------------|-----------------------------------------------------|--------------------------------------------------|
| <b>New South Wales</b>      |                        |                    |                                                                                 |          |           |       |                                       |                              |                                                     |                                                  |
| Berowra Creek <sup>17</sup> | Drowned valley estuary | -                  | <i>Juncus kraussii</i>                                                          | -33.626  | 151.12    | 1     | -                                     | -                            | 84                                                  | 309                                              |
| Carama Inlet <sup>17</sup>  | Marine embayment       | -                  | <i>Sarcocornia quinqueflora</i>                                                 | -34.985  | 150.772   | 1     | -                                     | -                            | 64.5                                                | 124.5                                            |
| Clarence River              | Barrier estuary        | Marine             | <i>Sporobolus virginicus</i> - <i>Juncus kraussii</i>                           | -29.434  | 153.356   | 8     | 1.46 $\pm$ 0.03                       | 0.75 $\pm$ 0.09              | 24.35 $\pm$ 2.42                                    | 36.83 $\pm$ 4.53                                 |
|                             |                        | Fluvial            | <i>Sporobolus virginicus</i> - <i>Baumea juncea</i>                             | -29.379  | 153.352   | 8     | 1.26 $\pm$ 0.1                        | 1.27 $\pm$ 0.29              | 49.98 $\pm$ 8.51                                    | 94.07 $\pm$ 16.24                                |
| Clyde River                 | Drowned valley estuary | Marine             | <i>Sarcocornia quinqueflora</i> - <i>Juncus kraussii</i>                        | -35.710  | 150.172   | 8     | 1.22 $\pm$ 0.08                       | 1.1 $\pm$ 0.32               | 34.87 $\pm$ 6.65                                    | 104.09 $\pm$ 20.93                               |
|                             |                        | Fluvial            | <i>Sarcocornia quinqueflora</i> - <i>Juncus kraussii</i> - <i>Baumea juncea</i> | -35.692  | 150.099   | 8     | 0.48 $\pm$ 0.08                       | 11 $\pm$ 1.1                 | 127.3 $\pm$ 7.72                                    | 420.18 $\pm$ 24.64                               |
| Crookhaven River            | Barrier estuary        | Marine             | <i>Sporobolus virginicus</i> - <i>Juncus kraussii</i>                           | -34.909  | 150.741   | 8     | 1.26 $\pm$ 0.08                       | 2.01 $\pm$ 0.55              | 56.84 $\pm$ 10.81                                   | 199.76 $\pm$ 21.18                               |
|                             |                        | Fluvial            | <i>Sporobolus virginicus</i> - <i>Juncus kraussii</i>                           | -34.935  | 150.714   | 8     | 0.66 $\pm$ 0.11                       | 7.38 $\pm$ 1.05              | 110.53 $\pm$ 18.5                                   | 262.02 $\pm$ 42.3                                |

|                                       |                                     |         |                                                                |           |            |   |             |              |               |                |
|---------------------------------------|-------------------------------------|---------|----------------------------------------------------------------|-----------|------------|---|-------------|--------------|---------------|----------------|
| Currambene Creek<br><sup>17, 74</sup> | Marine embayment – Riverine estuary | -       | <i>Sarcocornia quinqueflora</i> - <i>Juncus kraussii</i>       | -35.019   | 150.667    | 3 | -           | -            | 77.77 ± 29.62 | 139.35 ± 62.39 |
| Georges River                         |                                     | Marine  | <i>Sarcocornia quinqueflora</i> - <i>Sporobolus virginicus</i> | -34.01966 | 151.153076 | 3 | 0.99 ± 0.16 | 4.81 ± 2.18  | 39.59 ± 9.27  | 127.58 ± 29.88 |
|                                       |                                     | Fluvial | <i>Sarcocornia quinqueflora</i> - <i>Sporobolus virginicus</i> | -33.9847  | 151.010312 | 3 | 0.37 ± 0.9  | 9.05 ± 3.02  | 62.54 ± 11.95 | 201.52 ± 38.5  |
| Kooragang Island<br><sup>17</sup>     | Barrier estuary                     | -       | <i>Sporobolus virginicus</i>                                   | -32.848   | 151.72     | 1 | -           | -            | 97.5          | 161.5          |
| Lake Cathie                           | Saline coastal lagoon               | Marine  | <i>Paspalum vaginatum</i> - <i>Juncus kraussii</i>             | -31.549   | 152.850    | 8 | 1.21 ± 0.13 | 1.93 ± 0.64  | 41.24 ± 5.45  | 75.35 ± 8.97   |
|                                       |                                     | Fluvial | <i>Sarcocornia quinqueflora</i> - <i>Juncus kraussii</i>       | -31.551   | 152.845    | 8 | 0.23 ± 0.03 | 20.43 ± 1.19 | 123.09 ± 9.31 | 340.36 ± 42.01 |
| Macleay River                         | Barrier estuary                     | Marine  | <i>Sporobolus virginicus</i> - <i>Juncus kraussii</i>          | -30.882   | 153.021    | 8 | 0.96 ± 0.07 | 2.3 ± 0.22   | 58.29 ± 4.92  | 220.24 ± 16.61 |
|                                       |                                     | Fluvial | <i>Sporobolus virginicus</i> - <i>Juncus kraussii</i>          | -30.894   | 152.999    | 8 | 1.09 ± 0.07 | 2.25 ± 0.4   | 56.24 ± 5.56  | 207.61 ± 14.08 |
| Marramarra Creek<br><sup>17</sup>     | Drowned valley estuary              | -       | <i>Juncus kraussii</i>                                         | -33.523   | 151.1      | 1 | -           | -            | 93            | 335            |
| Port Stephens                         | Drowned valley estuary              | Marine  | <i>Sporobolus virginicus</i> - <i>Sarcocornia quinqueflora</i> | -32.669   | 152.145    | 9 | 1.18 ± 0.07 | 1.63 ± 0.24  | 52.26 ± 4.77  | 181.68 ± 12.62 |

|                                          |                        |         |                                                                                         |          |          |   |             |             |               |                |
|------------------------------------------|------------------------|---------|-----------------------------------------------------------------------------------------|----------|----------|---|-------------|-------------|---------------|----------------|
|                                          |                        |         | - <i>Juncus kraussi</i>                                                                 |          |          |   |             |             |               |                |
|                                          |                        | Fluvial | <i>Sporobolus virginicus</i> - <i>Sarcocornia quinqueflora</i> - <i>Juncus kraussi</i>  | -32.643  | 151.989  | 9 | 0.74 ± 0.08 | 3.13 ± 0.29 | 52.97 ± 6.49  | 220.08 ± 15.76 |
| Tuross River                             | Barrier estuary        | Marine  | <i>Sarcocornia quinqueflora</i> - <i>Juncus kraussii</i>                                | -36.077  | 150.123  | 8 | 1.41 ± 0.05 | 0.64 ± 0.07 | 23.63 ± 2.25  | 69.33 ± 8.02   |
|                                          |                        | Fluvial | <i>Sarcocornia quinqueflora</i> - <i>Juncus kraussii</i>                                | -36.055  | 150.063  | 8 | 0.39 ± 0.04 | 9.26 ± 0.52 | 96.79 ± 4.5   | 298.12 ± 22.63 |
| Wallis Lake                              | Barrier estuary        | Marine  | <i>Sporobolus virginicus</i> - <i>Sarcocornia quinqueflora</i> - <i>Juncus kraussii</i> | -32.201  | 152.509  | 8 | 1.1 ± 0.09  | 2.43 ± 0.48 | 55.49 ± 9.34  | 102.08 ± 12.04 |
|                                          |                        | Fluvial | <i>Sporobolus virginicus</i> - <i>Juncus kraussii</i>                                   | -32.335  | 152.487  | 8 | 0.3 ± 0.03  | 17.8 ± 1.8  | 143.43 ± 5.57 | 422.42 ± 19.22 |
| Wapengo Lake                             | Barrier estuary        | Marine  | <i>Sarcocornia quinqueflora</i> - <i>Juncus kraussii</i>                                | -36.620  | 150.015  | 9 | 1.21 ± 0.07 | 1.5 ± 0.34  | 38.03 ± 7.23  | 72.29 ± 14.94  |
|                                          |                        | Fluvial | <i>Sarcocornia quinqueflora</i> - <i>Juncus kraussii</i>                                | -36.589  | 150.016  | 9 | 0.66 ± 0.05 | 8.99 ± 1.13 | 117.85 ± 8.32 | 215.51 ± 13.21 |
| <b>Northern Territory</b>                |                        |         |                                                                                         |          |          |   |             |             |               |                |
| Middle Arm, Darwin Harbour <sup>75</sup> | Drowned valley estuary | -       | Samphire - Saltflat                                                                     | -12.6482 | 130.9639 | 1 | -           | -           | 46            | 69.77          |

|                        |                                     |   |                                 |           |            |   |             |              |                 |                 |
|------------------------|-------------------------------------|---|---------------------------------|-----------|------------|---|-------------|--------------|-----------------|-----------------|
| <b>Queensland</b>      |                                     |   |                                 |           |            |   |             |              |                 |                 |
| Adams Beach            | Sand island                         | - | <i>Juncus kraussii</i>          | -27.52054 | 153.41237  | 3 | 0.14 ± 0.01 | 19.87 ± 0.26 | 46.48 ± 16.27   | 371.93 ± 296.01 |
| Amity north            | Sand island                         | - | <i>Juncus kraussii</i>          | -27.43511 | 153.43516  | 3 | 0.45 ± 0.19 | 14.72 ± 7.19 | 221.07 ± 191.31 | 314.19 ± 212.88 |
| Amity South            | Sand island                         | - | <i>Juncus kraussii</i>          | -27.43796 | 153.4342   | 3 | 0.41 ± 0.17 | 10.96 ± 6.01 | 181.77 ± 140.21 | 139.08 ± 34.42  |
| Halloran Reserve       | Tidal creek - embayment             | - | <i>Sarcocornia quinqueflora</i> | -27.5699  | 153.29056  | 3 | 1.24 ± 0.04 | 0.81 ± 0.15  | 69.37 ± 21.4    | 64.43 ± 28.6    |
| Nundah Creek           | Tidal creek - embayment             | - | <i>Sarcocornia quinqueflora</i> | -27.35169 | 153.08588  | 3 | 0.86 ± 0.16 | 4.07 ± 1.52  | 51.98 ± 17.99   | 87.6 ± 24.82    |
| Tinchi Tamba Reserve   | Tidal creek - embayment             | - | <i>Sarcocornia quinqueflora</i> | -27.28858 | 153.04543  | 3 | 1.27 ± 0.05 | 1.60 ± 0.33  | 120.05 ± 52.38  | 140.35 ± 98.15  |
| <b>South Australia</b> |                                     |   |                                 |           |            |   |             |              |                 |                 |
| Port Augusta           | Marine embayment - Riverine estuary | - | <i>Sarcocornia quinqueflora</i> | -32.47853 | 137.76463  | 1 | 0.52 ± 0.09 | 5.11 ± 1.11  | 62.73           | N/A             |
| Port Broughton         | Marine inlet                        | - | <i>Sarcocornia quinqueflora</i> | -33.56679 | 137.949759 | 3 | 0.42 ± 0.17 | 6.86 ± 2.71  | 48.54 ± 12.65   | 146.89 ± 61.02  |
| Whyalla                | Marine embayment                    | - | <i>Juncus kraussii</i>          | -33.04877 | 137.56947  | 1 | 0.34 ± 0.02 | 8.21 ± 0.22  | 74.66           | 238.46          |
| <b>Victoria</b>        |                                     |   |                                 |           |            |   |             |              |                 |                 |
| Anderson Inlet         | Riverine estuary - Marine inlet     | - | <i>Sarcocornia quinqueflora</i> | -38.66    | 145.7896   | 3 | 0.97 ± 0.23 | 4.27 ± 2.33  | 64.04 ± 3.42    | 146.89 ± 61.02  |
| Barwon River           | Estuarine                           | - | <i>Tecticornia -</i>            | -38.2476  | 144.499016 | 3 | 0.34 ±      | 13.11 ± 1.11 | 74.45 ± 175.56  | 116.66 ± 3.62   |

|                                                   |                                      |         |                                                                    |            |            |   |                |              |                |                |
|---------------------------------------------------|--------------------------------------|---------|--------------------------------------------------------------------|------------|------------|---|----------------|--------------|----------------|----------------|
| Estuary                                           | lagoon -<br>River estuary            |         | <i>Sarcocornia<br/>quinqueflora</i>                                |            | 7          |   | 0.05           |              |                |                |
| Cheetham<br>Saltworks                             | Marine<br>embayment                  | -       | <i>Tecticornia -<br/>Sarcocornia<br/>quinqueflora</i>              | -37.897267 | 144.7841   | 3 | 0.31 ±<br>0.05 | 13.73 ± 1.88 | 81.7 ± 10.32   | 129.96 ± 17.09 |
| China Bay                                         | Marine<br>embayment                  | -       | <i>Sarcocornia<br/>quinqueflora<br/>- Suaeda<br/>australis</i>     | -38.22775  | 145.31115  | 3 | 0.22 ±<br>0.03 | 24.61 ± 4.13 | 124.45 ± 11.58 | 184.11 ± 29.64 |
| Corner Inlet (1)                                  | Marine<br>embayment                  |         | <i>Tecticornia -<br/>Suaeda<br/>australis</i>                      | -38.689367 | 146.33515  | 3 | 1.36 ±<br>0.22 | 0.96 ± 0.39  | TO DO          | 37.28 ± 4.77   |
| Corner Inlet (2)                                  | Marine<br>embayment                  | Fluvial | <i>Tecticornia -<br/>Suaeda<br/>australis</i>                      | -38.69365  | 146.2436   | 3 | 0.77 ±<br>0.2  | 3.38 ± 1.59  | TO DO          | 60.44 ± 20.13  |
| Eagle Point Bay                                   | River estuary<br>- Barrier<br>lagoon | -       | <i>Sarcocornia<br/>quinqueflora</i>                                | -37.902534 | 147.71895  | 3 | 0.14 ±<br>0.02 | 37.72 ± 1.37 | 243.73 ± 25.67 | 382.55 ± 44.11 |
| Fawthrop Lagoon<br>(Wattle Hill Creek)<br>Estuary | Coastal<br>lagoon                    | -       | <i>Sarcocornia<br/>quinqueflora<br/>-<br/>Suaeda<br/>australis</i> | -38.3541   | 141.60165  | 3 | 0.3 ±<br>0.03  | 13.1 ± 1.59  | 48.09 ± 5.38   | 73.71 ± 8.17   |
| Glenelg Estuary -<br>Oxbow Lake                   | Estuarine<br>lake - Open             | -       | <i>Sarcocornia<br/>quinqueflora</i>                                | -38.06     | 141.001784 | 3 | 0.21 ±<br>0.03 | 18.99 ± 0.69 | 62.13 ± 6.36   | 94.87 ± 9.57   |
| Jacks Beach <sup>16</sup>                         | Marine<br>embayment                  | -       | <i>Sarcocornia<br/>quinqueflora</i>                                | -38.340157 | 145.258526 | 1 | -              | -            | 79             | 173            |
|                                                   | Estuarine                            | Fluvial |                                                                    | -38.182734 | 147.306484 | 3 | 0.42 ±         | 19.22 ± 1.05 | 210.78 ± 47.84 | 336.12 ± 77.62 |

|                                |                                 |         |                                               |            |            |   |             |              |                |                |
|--------------------------------|---------------------------------|---------|-----------------------------------------------|------------|------------|---|-------------|--------------|----------------|----------------|
| Lake Coleman                   | lake - Open                     |         | <i>Tecticornia - Suaeda australis</i>         |            |            |   | 0.1         |              |                |                |
| Lake Connewarre Reserve (1)    | Riverine Estuary                | -       | <i>Sarcocornia quinqueflora</i>               | -38.250934 | 144.438117 | 3 | 0.52 ± 0.14 | 12.85 ± 5.51 | 58.31 ± 14.49  | 90.34 ± 24.33  |
| Lake Connewarre Reserve (2)    | Riverine estuary                | Fluvial | <i>Sarcocornia quinqueflora</i>               | -38.241234 | 144.4209   | 3 | 0.18 ± 0.02 | 25.92 ± 1.27 | 59.97 ± 4.71   | 93.27 ± 7.3    |
| Lake King - Cunninghame Arm    | Coastal lagoon                  | Marine  | <i>Sarcocornia quinqueflora</i>               | -37.875834 | 148.0101   | 3 | 0.77 ± 0.22 | 2.57 ± 1.25  | 26.36 ± 6.68   | 41.79 ± 10.37  |
| Lakes Entrance - Maringa Creek | Creek estuary - Coastal lagoon  | -       | <i>Sarcocornia quinqueflora</i>               | -37.870617 | 147.939184 | 3 | 0.15 ± 0.01 | 24.54 ± 1.99 | 128.63 ± 10.62 | 201.73 ± 17.18 |
| Limeburners Lagoon             | Riverine estuary                | -       | <i>Tecticornia - Sarcocornia quinqueflora</i> | -38.052767 | 144.411    | 3 | 0.7 ± 0.2   | 3.16 ± 0.9   | 106.26 ± 57.76 | 173.5 ± 98.1   |
| Mallacoota Inlet - Bottom Lake | Marine inlet                    | Marine  | <i>Tecticornia</i>                            | -37.566917 | 149.760817 | 3 | 1.5 ± 0.29  | 0.55 ± 0.07  | 18.92 ± 2.93   | 29.93 ± 4.74   |
| Mallacoota Inlet - Top Lake    | Marine inlet - Riverine estuary | Fluvial | <i>Sarcocornia quinqueflora</i>               | -37.525967 | 149.69725  | 3 | 0.2 ± 0     | 20.51 ± 0.91 | 90.12 ± 5.98   | 143.18 ± 9.97  |
| Merri River Estuary            | Riverine estuary                | -       | <i>Sarcocornia quinqueflora</i>               | -38.395034 | 142.467617 | 3 | 0.15 ± 0.01 | 33.4 ± 2.71  | 95.12 ± 8.89   | 148.59 ± 14.46 |
| Moyne River                    | Riverine estuary                | -       | <i>Sarcocornia quinqueflora</i>               | -38.3652   | 142.250617 | 3 | 0.26 ± 0.05 | 17.09 ± 3.71 | 96.21 ± 9.19   | 152.25 ± 14.33 |

|                                         |                           |        |                                               |            |            |   |             |              |                |                |
|-----------------------------------------|---------------------------|--------|-----------------------------------------------|------------|------------|---|-------------|--------------|----------------|----------------|
| Estuary - Belfast Lough (1)             |                           |        |                                               |            |            |   |             |              |                |                |
| Moyne River Estuary - Belfast Lough (2) | Riverine estuary          | Marine | <i>Suaeda australis</i>                       | -38.38045  | 142.239717 | 3 | 0.24 ± 0.04 | 16.35 ± 3.93 | 68.75 ± 9.34   | 106.93 ± 15.76 |
| Nooramunga Marine and Coastal Park (1)  | Marine inlet - Sand flats | -      | <i>Sarcocornia quinqueflora</i>               | -38.6752   | 146.691684 | 3 | 0.86 ± 0.07 | 2.95 ± 0.17  | 39.56 ± 3.66   | 61.46 ± 5.76   |
| Nooramunga Marine and Coastal Park (2)  | Marine inlet - Sand flats | -      | <i>Sarcocornia quinqueflora</i>               | -38.698817 | 146.46855  | 3 | 1.22 ± 0.24 | 0.7 ± 0.2    | 16.01 ± 3.57   | 24.94 ± 5.51   |
| Nooramunga Marine and Coastal Park (3)  | Marine Inlet - Sand flats | -      | <i>Tecticornia - Sarcocornia quinqueflora</i> | -38.60935  | 146.88875  | 3 | 0.46 ± 0.15 | 17.1 ± 5.92  | 110.73 ± 22.11 | 175.42 ± 37.05 |
| Nooramunga Marine and Coastal Park (4)  | Marine inlet - Sand flats | -      | <i>Sarcocornia quinqueflora</i>               | -38.64635  | 146.780917 | 3 | 1.54 ± 0.03 | 0.58 ± 0.08  | 22.81 ± 3.68   | 36.08 ± 6.13   |
| Painkalac Creek Estuary                 | Riverine estuary          | -      | <i>Tecticornia - Sarcocornia quinqueflora</i> | -38.466617 | 144.096634 | 3 | 0.29 ± 0.09 | 28.62 ± 6.08 | 113.61 ± 19.78 | 177.25 ± 31.34 |
| Phillip Island                          | Marine embayment          | Marine | <i>Sarcocornia quinqueflora</i>               | -38.51     | 145.345117 | 3 | 0.48 ± 0.1  | 6.77 ± 1.55  | 73.85 ± 5.84   | 116.1 ± 9.15   |
| Port Phillip Bay                        | Marine embayment          | -      | <i>Sarcocornia quinqueflora - Suaeda</i>      | -37.8663   | 144.878984 | 3 | 0.19 ± 0.01 | 24.22 ± 2.04 | 98.06 ± 24.93  | 154.65 ± 39.66 |



|                            |                  |         |                                                    |            |            |   |             |              |                |                |
|----------------------------|------------------|---------|----------------------------------------------------|------------|------------|---|-------------|--------------|----------------|----------------|
|                            |                  |         | <i>australis</i>                                   |            |            |   |             |              |                |                |
| Rhyll Inlet                | Marine embayment | -       | <i>Sarcocornia quinqueflora</i>                    | -38.45945  | 145.2882   | 3 | 0.24 ± 0.03 | 25.32 ± 7.41 | 93.99 ± 9.29   | 213.61 ± 36.84 |
| Salt Lagoon                | Marine embayment | -       | <i>Tecticornia - Sarcocornia quinqueflora</i>      | -38.161167 | 144.7143   | 3 | 0.38 ± 0.07 | 14.79 ± 4    | 50.69 ± 4.7    | 77.26 ± 7.37   |
| Shallow Inlet              | Marine inlet     | Marine  | -                                                  | -38.836384 | 146.151417 | 3 | 1.18 ± 0.12 | 1.33 ± 0.5   | 31.93 ± 4.09   | 49.89 ± 6.16   |
| Stony Point <sup>16</sup>  | Marine embayment | -       | <i>Sarcocornia quinqueflora</i>                    | -38.365613 | 145.213855 | 1 | -           | -            | 78.2           | 164.1          |
| Swan Bay (1)               | Marine embayment | -       | <i>Sarcocornia quinqueflora</i>                    | -38.227717 | 144.651834 | 3 | 0.31 ± 0.02 | 13.83 ± 2.9  | 101.02 ± 12.5  | 157.34 ± 18.96 |
| Swan Bay (2)               | Marine embayment | -       | <i>Tecticornia - Sarcocornia quinqueflora</i>      | -38.2667   | 144.63605  | 3 | 0.27 ± 0.04 | 17.85 ± 5.89 | 71.78 ± 5.14   | 112.17 ± 8.82  |
| Swan Bay (3)               | Marine embayment | Marine  | <i>Tecticornia - Suaeda australis</i>              | -38.19715  | 144.698734 | 3 | 0.26 ± 0.07 | 4.84 ± 4.84  | 104.22 ± 31.89 | 177.42 ± 37.37 |
| Thompson Creek Estuary (1) | Riverine estuary | -       | <i>Sarcocornia quinqueflora - Suaeda australis</i> | -38.294967 | 144.386184 | 3 | 0.8 ± 0.03  | 4.7 ± 0.76   | 54.31 ± 2.27   | 83.77 ± 3.58   |
| Thompson Creek Estuary (2) | Riverine estuary | Fluvial | <i>Sarcocornia quinqueflora</i>                    | -38.286484 | 144.400717 | 3 | 0.19 ± 0.02 | 33.01 ± 0.64 | 142.35 ± 27.41 | 223.12 ± 45.04 |
| Tooradin Coastal Reserve   | Marine embayment | Fluvial | <i>Sarcocornia quinqueflora - Suaeda</i>           | -38.213267 | 145.376884 | 3 | 0.36 ± 0.16 | 13.36 ± 4.19 | 135.87 ± 23.38 | 133.76 ± 19.48 |

|                                     |                                     |   |                                                    |            |            |   |             |              |                |                |
|-------------------------------------|-------------------------------------|---|----------------------------------------------------|------------|------------|---|-------------|--------------|----------------|----------------|
|                                     |                                     |   | <i>australis</i>                                   |            |            |   |             |              |                |                |
| Warringine Park                     | Marine embayment                    | - | <i>Tecticornia - Sarcocornia quinqueflora</i>      | -38.3179   | 145.195717 | 3 | 0.22 ± 0    | 23.58 ± 2.78 | 114.61 ± 18.15 | 198.68 ± 19.07 |
| Werribee River Estuary              | Riverine estuary - Marine embayment | - | <i>Sarcocornia quinqueflora - Suaeda australis</i> | -37.970633 | 144.684283 | 3 | 0.6 ± 0.17  | 8.12 ± 1.33  | 57.63 ± 6.54   | 89.57 ± 10.39  |
| Western Port Bay                    | Marine embayment                    | - | <i>Sarcocornia quinqueflora</i>                    | -38.260683 | 145.494967 | 2 | 0.91 ± 0.01 | 3.85 ± 0.17  | 88.66 ± 18.45  | 162.01 ± 8.37  |
| Western Port Coastal Reserve        | Marine embayment                    | - | <i>Suaeda australis</i>                            | -38.24955  | 145.248667 | 3 | 0.35 ± 0.09 | 13.03 ± 2.72 | 107.93 ± 6.38  | 170.26 ± 10.46 |
| Yambuk Lake Estuary                 | ICO lake                            | - | <i>Sarcocornia quinqueflora</i>                    | -38.330133 | 142.064567 | 3 | 0.4 ± 0.12  | 10.65 ± 0.45 | 136.35 ± 8.08  | 217.84 ± 12.51 |
| Yaringa National Park <sup>16</sup> | Marine embayment                    | - | <i>Sarcocornia quinqueflora</i>                    | -38.239763 | 145.258526 | 1 | -           | -            | 72.7           | 169.1          |
| Yarra Estuary                       | Riverine estuary - Marine embayment | - | <i>Sarcocornia quinqueflora - Suaeda australis</i> | -37.8252   | 144.89635  | 3 | 0.46 ± 0.19 | 13.91 ± 2.55 | 172.28 ± 8.23  | 273.23 ± 12.33 |
| <b>Western Australia</b>            |                                     |   |                                                    |            |            |   |             |              |                |                |
| Lake Macleod                        | Periodically inundated lake         | - | -                                                  | -23.95     | 113.633333 | 1 | 1.05 ± 0.07 | 0.74 ± 0.09  | 20.77          | 101.59         |
| Wonnerup Inlet (1)                  | Marine Inlet                        | - | <i>Juncus kraussii</i>                             | -33.61362  | 115.42524  | 3 | 0.4 ± 0.09  | 11.08 ± 4.5  | 62.49 ± 24.15  | 92.23 ± 28.01  |

|                    |                  |   |                        |           |            |   |             |             |              |                |
|--------------------|------------------|---|------------------------|-----------|------------|---|-------------|-------------|--------------|----------------|
|                    |                  |   |                        |           |            |   |             |             |              |                |
| Wonnerup Inlet (2) | Marine inlet     | - | <i>Juncus kraussii</i> | -33.62914 | 115.407914 | 3 | 0.68 ± 0.16 | 9.1 ± 2.47  | 37.51 ± 2.99 | 76.8 ± 16.06   |
| Vasse Estuary      | Riverine estuary | - | -                      | -33.61714 | 115.41707  | 3 | 0.94 ± 0.08 | 4.07 ± 0.94 | 36.8 ± 6.73  | 101.28 ± 18.88 |

**Appendix 2.** Data used to calculate organic carbon accumulation rates. Values were derived from previously published work and included vertical accretion from marker horizons, sediment pins and lead 210 dating, and surface elevation change from surface elevation tables (SETs).

| State           | Location             | Mean vertical accretion (mm yr <sup>-1</sup> ) | Surface elevation (mm yr <sup>-1</sup> ) | Source                        |
|-----------------|----------------------|------------------------------------------------|------------------------------------------|-------------------------------|
| New South Wales | Kooragang Island     | 2.03 ± 0.38                                    | 192 ± 0.98                               | Rogers <i>et al.</i> (2013)   |
| New South Wales | Kooragang Island     | 0.98 -                                         | -                                        | Howe <i>et al.</i> (2009)     |
| New South Wales | Carama Inlet         | 1.27 ± 0.13                                    | 3.25 ± 0.71                              | Rogers <i>et al.</i> (2006)   |
| New South Wales | Minnamurra River     | 5.93 ± 1.21                                    | 0.26 ± 0.87                              | Rogers <i>et al.</i> (2006)   |
| New South Wales | Ukerebagh            | 0.5 ± 0.23                                     | 0.49 ± 0.68                              | Rogers <i>et al.</i> (2006)   |
| New South Wales | Berowra Creek        | 5.05 ± 0.72                                    | -                                        | Rogers (2004)                 |
| New South Wales | Homebush Bay         | 2.2 ± 0.29                                     | 2.92 ± 1.59                              | Rogers <i>et al.</i> (2006)   |
| New South Wales | Minnamurra Creek     | 1.79 ± 0.56                                    | -                                        | Rogers <i>et al.</i> (2006)   |
| New South Wales | Currambene           | 0.33 ± 0.11                                    | 0.14 ± 1.48                              | Rogers <i>et al.</i> (2006)   |
| New South Wales | Port Stephens (M)    | 0.54 - (Pb 210)                                | -                                        | Unpublished                   |
| New South Wales | Port Stephens (F)    | 1.75 - (Pb 210)                                | -                                        | Unpublished                   |
| New South Wales | Wapengo Lake (M)     | 2.01 - (Pb 210)                                | -                                        | Unpublished                   |
| New South Wales | Wapengo Lake (F)     | 0.69 - (Pb 210)                                | -                                        | Unpublished                   |
| Queensland      | Amity North          | -                                              | -0.08 ± 0.61                             | Lovelock <i>et al.</i> (2013) |
| Queensland      | Amity South          | -                                              | 0.18 ± 0.61                              | Lovelock <i>et al.</i> (2013) |
| Queensland      | Adams Beach          | -                                              | 5.92 ± 0.35                              | Lovelock <i>et al.</i> (2013) |
| Queensland      | Tinchi Tamba Reserve | -                                              | 0.45 ± 0.32                              | Lovelock <i>et al.</i> (2013) |
| Queensland      | Nundah Creek         | -                                              | 1.22 ± 0.92                              | Lovelock <i>et al.</i> (2013) |
| Queensland      | Halloran Reserve     | -                                              | 0.11 ± 0.09                              | Lovelock <i>et al.</i> (2013) |
| Victoria        | French Island        | 4.07 ± 0.025                                   | 5.27 ± 0.96                              | Rogers <i>et al.</i> (2006)   |
| Victoria        | Koo Wee Rup          | 2.03 ± 0.32                                    | -0.16 ± 0.94                             | Rogers <i>et al.</i> (2006)   |
|                 |                      | 1.63 ± 0.16 (Pb 210)                           | -                                        | Rogers <i>et al.</i> (2005)   |
| Victoria        | Quail Island         | 2.35 ± 0.96                                    | -0.68 ± 1.18                             | Rogers <i>et al.</i> (2006)   |
|                 |                      | 1.4 ± 0.2 (Pb 210)                             | -                                        | Rogers <i>et al.</i> (2005)   |
| Victoria        | Rhyll                | 1.59 ± 0.19                                    | 0.64 ± 0.75                              | Rogers <i>et al.</i> (2006)   |
|                 |                      | 2.5 ± 0.1 (Pb 210)                             | -                                        | Rogers <i>et al.</i> (2005)   |
| Average         |                      | 2.09 ± 0.32                                    | 1.44 ± 0.44                              |                               |
